# Supplementary material for: Effects of Lactobacillus rhamnosus and Enterococcus faecalis Supplementation as Direct-Fed Microbials on Rumen Microbiota of Boer and Speckled Goat Breeds
Source: MDPI journal article supplement (doi:10.3390/vetsci8060103), 2021-06-07
Supplement: s1 [file s1]

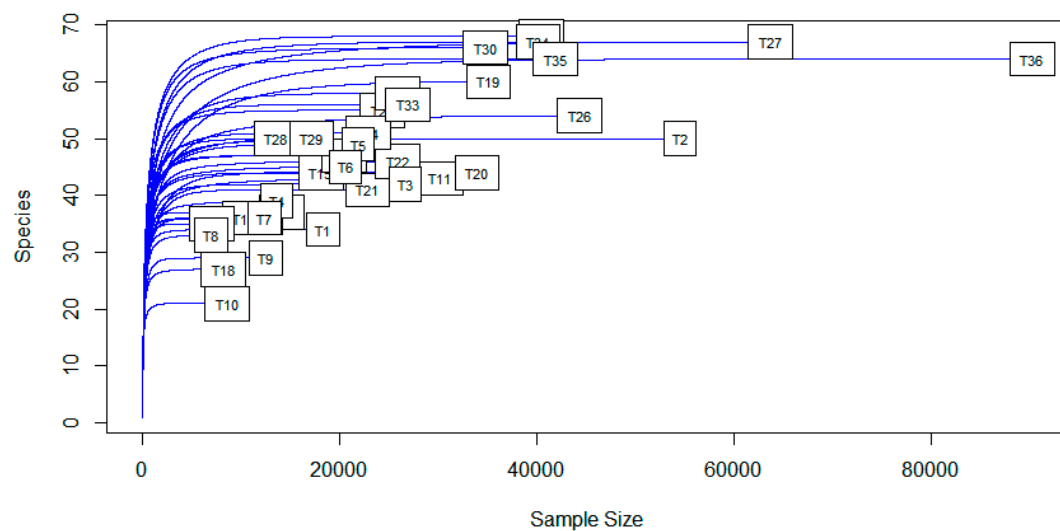

Supplementary Figure S1: Rarefaction curves for rumen microbial communities for each sample, showing species accumulation in the goats. T1-T18 indicates samples collected at the beginning of the trial (day 1) and T19-T36 were collected at the end of the trial (day 30).
